# Supplementary material for: Accelerated DNA methylation aging and increased resilience in veterans: The biological cost for soldiering on
Source: PubMed Central journal article supplement (PMC5991315; doi:10.1016/j.ynstr.2018.04.001), 2018-04-07

## Non Graphical Solutions to Scree Test

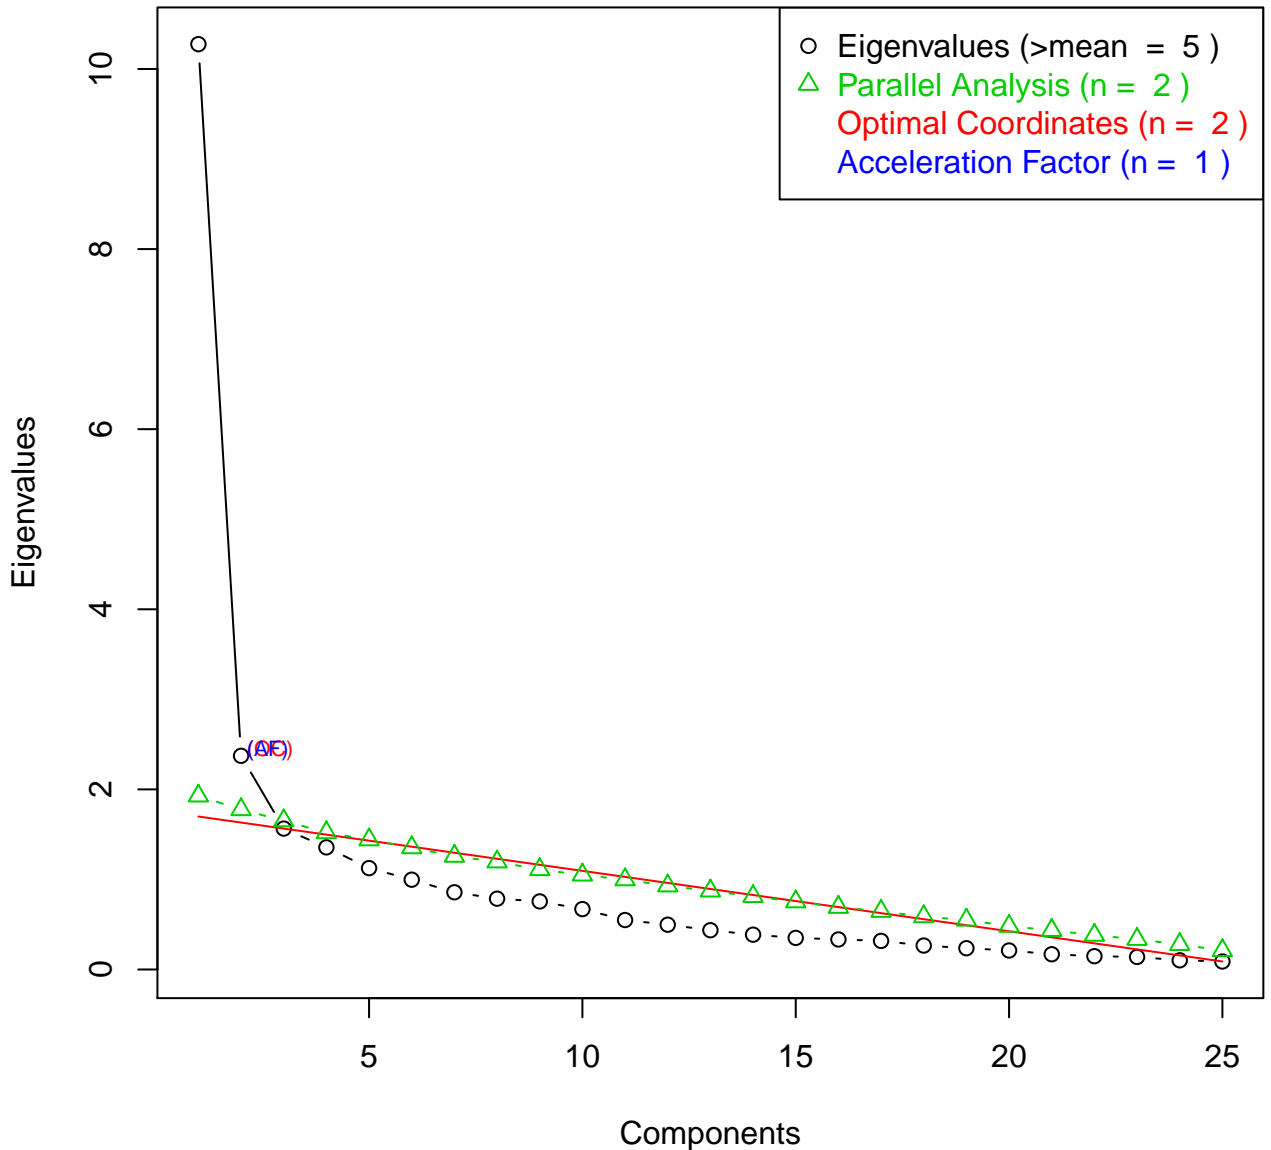

Supplement: mmc1.pdf [file mmc1.pdf]
