# Supplementary material for: Accelerated DNA methylation aging and increased resilience in veterans: The biological cost for soldiering on
Source: PubMed Central journal article supplement (PMC5991315; doi:10.1016/j.ynstr.2018.04.001), 2018-04-07

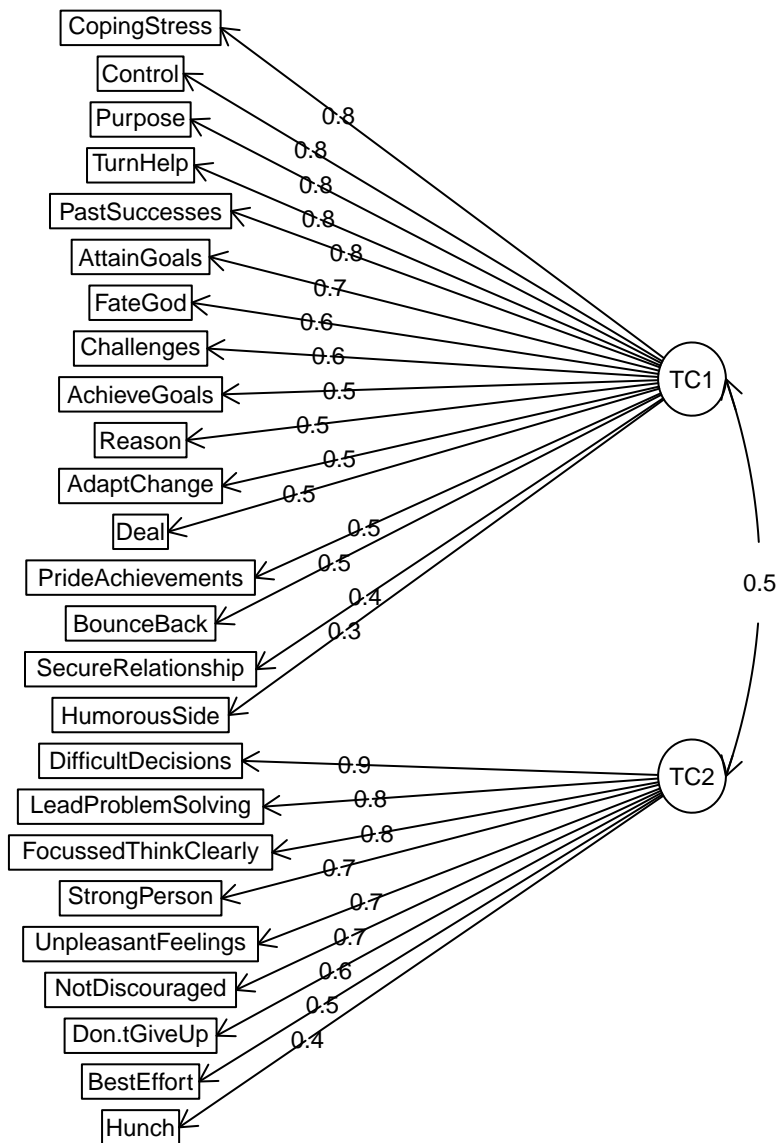

Supplement: mmc2.pdf [file mmc2.pdf]
